# Supplementary material for: Comparison of Venous and Capillary Sampling in Oral Glucose Testing for the Diagnosis of Gestational Diabetes Mellitus: A Diagnostic Accuracy Cross-Sectional Study Using Accu-Chek Inform II
Source: MDPI journal article supplement (doi:10.3390/diagnostics10121011), 2020-11-26
Supplement: s1 [file s1]

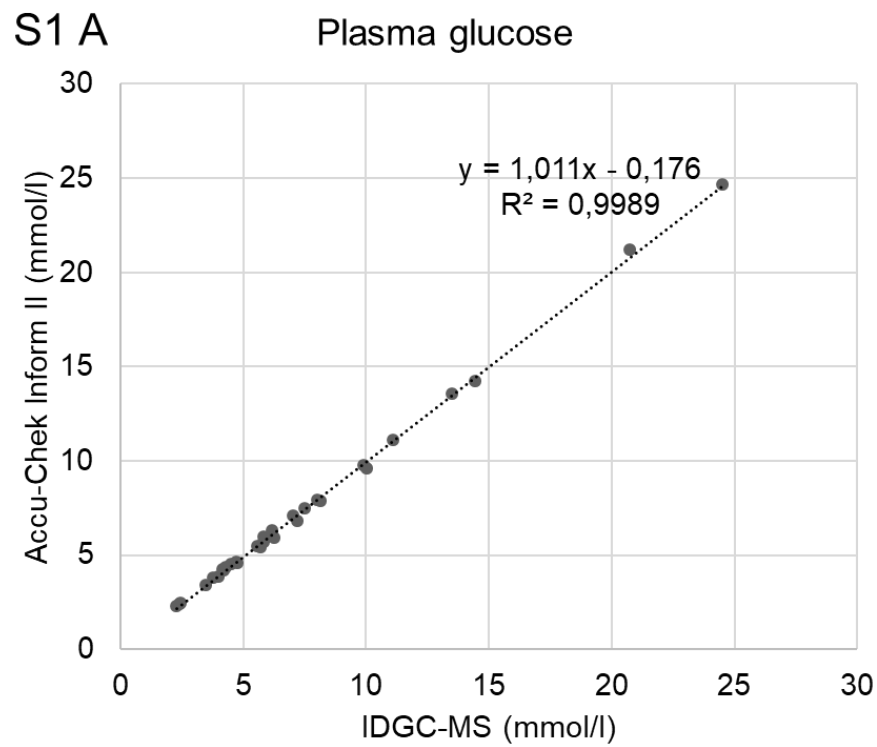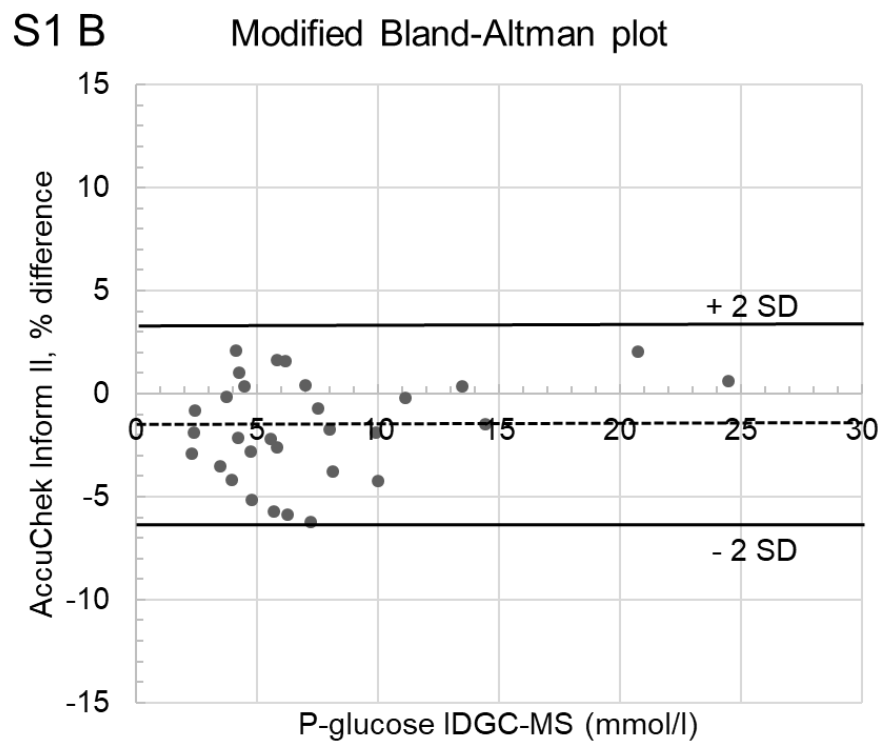

**Figure S1.** Validation of Accu-Chek Inform II against IDGC-MS reference method. Results represent mean values from four instruments and duplicate analyses on each instrument.
